# Supplementary material for: Transpressional tectonics during the Variscan-Alpine cycle transition: supporting a multi-rifting model, evidence from the European western Southern Alps
Source: Copernicus journal article supplement (doi:10.5194/egusphere-2024-1135), 2024-04-29
Supplement: Supplementary file 1 [file supplementary_Table S2.pdf › supplementary_Table S2.pdf]

| Sample | Zircon grain      | <sup>238</sup> U<br>mol | <sup>238</sup> U 1s<br>% | <sup>232</sup> Th<br>mol | <sup>232</sup> Th 1s<br>% | Th/U        | <sup>4</sup> He<br>mol | <sup>4</sup> He 1s<br>% | Rs<br>μm     | L<br>μm    | W1<br>μm  | W2<br>μm  | H<br>μm   | Mass<br>μg  |
|--------|-------------------|-------------------------|--------------------------|--------------------------|---------------------------|-------------|------------------------|-------------------------|--------------|------------|-----------|-----------|-----------|-------------|
| fct    | gf134fctz1        | 6.13E-12                | 0.32                     | 3.45E-12                 | 0.31                      | 0.56        | 1.82E-13               | 0.31                    | 39.99        | 188        | 66        | 58        | 27        | 2.70        |
|        | gf134fctz2        | 1.41E-11                | 0.10                     | 7.72E-12                 | 0.22                      | 0.55        | 4.67E-13               | 0.25                    | 59.07        | 260        | 102       | 85        | 40        | 8.30        |
|        | gf135fctz1        | 1.53E-11                | 0.39                     | 9.19E-12                 | 0.20                      | 0.60        | 4.96E-13               | 0.24                    | 58.23        | 354        | 101       | 75        | 43        | 10.49       |
|        | gf135fctz2        | 5.22E-12                | 0.28                     | 3.22E-12                 | 0.29                      | 0.62        | 1.54E-13               | 0.25                    | 52.69        | 202        | 86        | 86        | 38        | 5.20        |
|        | gf140fctz1        | 1.28E-11                | 0.44                     | 7.01E-12                 | 0.37                      | 0.55        | 4.09E-13               | 0.24                    | 56.39        | 242        | 96        | 83        | 39        | 7.01        |
|        | gf140fctz2        | 7.82E-12                | 0.26                     | 4.38E-12                 | 0.09                      | 0.56        | 2.28E-13               | 0.23                    | 60.35        | 228        | 102       | 96        | 53        | 7.17        |
| aft02  | <b>aft02z1</b>    | <b>4.18E-12</b>         | <b>0.54</b>              | <b>4.15E-13</b>          | <b>1.56</b>               | <b>0.10</b> | <b>5.40E-13</b>        | <b>0.23</b>             | <b>38.42</b> | <b>150</b> | <b>66</b> | <b>59</b> | <b>23</b> | <b>2.15</b> |
|        | <b>aft02z2</b>    | <b>4.35E-12</b>         | <b>0.33</b>              | <b>5.78E-13</b>          | <b>1.04</b>               | <b>0.13</b> | <b>6.87E-13</b>        | <b>0.24</b>             | <b>42.12</b> | <b>153</b> | <b>71</b> | <b>70</b> | <b>36</b> | <b>2.40</b> |
|        | <b>aft02z4</b>    | <b>4.37E-12</b>         | <b>0.33</b>              | <b>8.13E-13</b>          | <b>0.75</b>               | <b>0.19</b> | <b>6.94E-13</b>        | <b>0.24</b>             | <b>47.22</b> | <b>203</b> | <b>85</b> | <b>66</b> | <b>49</b> | <b>3.61</b> |
|        | <b>aft02z5</b>    | <b>2.59E-12</b>         | <b>0.58</b>              | <b>4.30E-13</b>          | <b>1.52</b>               | <b>0.17</b> | <b>4.61E-13</b>        | <b>0.24</b>             | <b>33.96</b> | <b>140</b> | <b>59</b> | <b>50</b> | <b>30</b> | <b>1.38</b> |
| aft03  | aft03z1           | 2.96E-11                | 0.22                     | 1.69E-10                 | 0.40                      | 5.71        | 1.89E-11               | 0.83                    | 34.90        | 119        | 64        | 56        | 32        | 1.27        |
|        | aft03z2           | 1.74E-11                | 0.08                     | 8.78E-11                 | 0.26                      | 5.03        | 1.08E-11               | 0.86                    | 56.68        | 247        | 108       | 76        | 52        | 6.85        |
|        | aft03z3           | 4.13E-11                | 0.27                     | 1.25E-10                 | 0.19                      | 3.03        | 1.81E-11               | 1.11                    | 35.61        | 129        | 62        | 57        | 14        | 1.80        |
|        | aft03z6           | 1.39E-13                | 13.97                    | 7.38E-14                 | 2.73                      | 0.53        | 5.88E-14               | 0.25                    | 83.49        | 562        | 144       | 106       | 48        | 35.39       |
| aft05  | <b>aft05z1</b>    | <b>4.73E-12</b>         | <b>0.55</b>              | <b>8.21E-13</b>          | <b>1.27</b>               | <b>0.17</b> | <b>1.40E-12</b>        | <b>1.32</b>             | <b>40.01</b> | <b>173</b> | <b>64</b> | <b>62</b> | <b>43</b> | <b>2.14</b> |
|        | <b>aft05z2</b>    | <b>3.20E-12</b>         | <b>0.46</b>              | <b>9.33E-13</b>          | <b>0.78</b>               | <b>0.29</b> | <b>8.65E-13</b>        | <b>1.10</b>             | <b>39.15</b> | <b>173</b> | <b>72</b> | <b>54</b> | <b>37</b> | <b>2.23</b> |
|        | <b>aft05z5</b>    | <b>3.15E-12</b>         | <b>0.53</b>              | <b>5.71E-13</b>          | <b>1.08</b>               | <b>0.18</b> | <b>7.59E-13</b>        | <b>0.24</b>             | <b>39.52</b> | <b>196</b> | <b>63</b> | <b>58</b> | <b>21</b> | <b>2.85</b> |
|        | <b>aft05dkzr1</b> | <b>3.82E-12</b>         | <b>0.54</b>              | <b>1.96E-12</b>          | <b>0.40</b>               | <b>0.51</b> | <b>1.03E-12</b>        | <b>0.25</b>             | <b>41.47</b> | <b>180</b> | <b>70</b> | <b>61</b> | <b>50</b> | <b>2.25</b> |
|        | <b>aft05dkzr2</b> | <b>4.32E-12</b>         | <b>0.64</b>              | <b>1.35E-12</b>          | <b>0.74</b>               | <b>0.31</b> | <b>1.12E-12</b>        | <b>0.24</b>             | <b>39.97</b> | <b>175</b> | <b>65</b> | <b>60</b> | <b>44</b> | <b>2.14</b> |
|        | <b>aft05dkzr3</b> | <b>3.58E-12</b>         | <b>0.54</b>              | <b>4.92E-13</b>          | <b>0.55</b>               | <b>0.14</b> | <b>9.92E-13</b>        | <b>0.24</b>             | <b>37.97</b> | <b>144</b> | <b>66</b> | <b>59</b> | <b>37</b> | <b>1.71</b> |
| aft06  | <b>aft05dkzr4</b> | <b>5.79E-12</b>         | <b>0.39</b>              | <b>1.09E-12</b>          | <b>0.20</b>               | <b>0.19</b> | <b>1.53E-12</b>        | <b>1.40</b>             | <b>42.94</b> | <b>187</b> | <b>69</b> | <b>66</b> | <b>45</b> | <b>2.69</b> |
|        | aft06z1           | 1.66E-11                | 0.23                     | 1.82E-12                 | 0.37                      | 0.11        | 4.76E-12               | 1.18                    | 64.36        | 262        | 111       | 96        | 67        | 8.55        |
|        | aft06z2           | 9.74E-12                | 0.15                     | 3.26E-12                 | 0.40                      | 0.33        | 3.23E-12               | 1.41                    | 65.29        | 246        | 108       | 106       | 55        | 9.20        |
|        | aft06z3           | 4.84E-12                | 0.33                     | 1.44E-12                 | 0.43                      | 0.30        | 1.61E-12               | 1.43                    | 53.28        | 195        | 89        | 88        | 62        | 4.08        |
|        | aft06z4           | 1.63E-12                | 0.85                     | 2.25E-13                 | 2.76                      | 0.14        | 5.03E-13               | 0.23                    | 37.57        | 150        | 62        | 59        | 35        | 1.74        |
|        | aft06z5           | 2.31E-12                | 0.66                     | 4.58E-13                 | 1.44                      | 0.20        | 5.42E-13               | 0.23                    | 39.96        | 159        | 73        | 58        | 35        | 2.21        |
| aft07  | <b>aft07z1</b>    | <b>3.60E-12</b>         | <b>0.51</b>              | <b>7.54E-13</b>          | <b>0.96</b>               | <b>0.21</b> | <b>7.35E-13</b>        | <b>0.24</b>             | <b>40.98</b> | <b>148</b> | <b>70</b> | <b>67</b> | <b>30</b> | <b>2.33</b> |
|        | <b>aft07z2</b>    | <b>3.99E-12</b>         | <b>0.39</b>              | <b>6.97E-13</b>          | <b>0.87</b>               | <b>0.17</b> | <b>8.40E-13</b>        | <b>1.38</b>             | <b>41.59</b> | <b>148</b> | <b>73</b> | <b>67</b> | <b>37</b> | <b>2.24</b> |

|       |            |          |      |          |      |      |          |      |       |     |     |    |    |      |
|-------|------------|----------|------|----------|------|------|----------|------|-------|-----|-----|----|----|------|
| aft08 | aft07z3    | 2.71E-12 | 0.61 | 6.67E-13 | 0.90 | 0.25 | 6.34E-13 | 0.24 | 39.83 | 147 | 69  | 63 | 39 | 1.92 |
|       | aft07z4    | 2.14E-12 | 0.71 | 3.69E-13 | 1.73 | 0.17 | 5.20E-13 | 0.24 | 36.84 | 123 | 64  | 63 | 33 | 1.48 |
|       | aft07z5    | 4.01E-12 | 0.42 | 7.48E-13 | 0.88 | 0.19 | 1.08E-12 | 1.22 | 43.52 | 157 | 77  | 69 | 29 | 2.91 |
|       | aft07dkzr1 | 5.68E-12 | 0.38 | 1.47E-12 | 0.19 | 0.26 | 1.51E-12 | 1.45 | 40.85 | 246 | 62  | 59 | 40 | 3.27 |
|       | aft07dkzr2 | 5.23E-12 | 0.41 | 1.91E-12 | 0.23 | 0.37 | 1.42E-12 | 1.76 | 46.02 | 158 | 103 | 66 | 37 | 3.44 |
|       | aft07dkzr3 | 7.22E-12 | 0.42 | 2.08E-12 | 0.21 | 0.29 | 1.53E-12 | 2.03 | 39.70 | 142 | 69  | 64 | 31 | 2.07 |
|       | aft07dkzr4 | 1.40E-11 | 0.32 | 2.80E-12 | 0.18 | 0.20 | 2.31E-12 | 1.48 | 41.83 | 191 | 66  | 64 | 29 | 2.98 |
|       | aft07dkzr5 | 1.38E-11 | 0.24 | 3.01E-12 | 0.17 | 0.22 | 2.65E-12 | 1.68 | 43.04 | 184 | 69  | 66 | 34 | 2.96 |
|       | aft07dkzr6 | 5.37E-12 | 0.43 | 1.11E-12 | 0.56 | 0.21 | 1.18E-12 | 0.23 | 39.11 | 169 | 63  | 60 | 26 | 2.37 |
|       | aft08z1    | 1.53E-12 | 0.89 | 8.02E-13 | 0.81 | 0.53 | 4.41E-13 | 0.23 | 39.06 | 163 | 64  | 61 | 24 | 2.35 |
|       | aft08z2    | 3.46E-12 | 0.51 | 3.02E-12 | 0.26 | 0.87 | 1.10E-12 | 0.22 | 40.71 | 138 | 72  | 68 | 29 | 2.26 |
|       | aft08z3    | 3.29E-12 | 0.46 | 2.30E-12 | 0.39 | 0.70 | 9.64E-13 | 0.24 | 39.02 | 148 | 64  | 64 | 30 | 2.05 |
|       | aft08z4    | 2.00E-12 | 0.78 | 1.86E-12 | 0.40 | 0.93 | 6.53E-13 | 0.24 | 36.32 | 138 | 61  | 58 | 29 | 1.63 |

| eU         | Ft          | Ft Age       | Ft Age      | Average       | Average          |
|------------|-------------|--------------|-------------|---------------|------------------|
| ppm        |             | Ma           | 1s<br>Ma    | Age<br>Ma     | Age 1s<br>Ma / % |
| 614        | 0.71        | 28.6         | 0.09        | 27.21         | 1.54             |
| 457        | 0.80        | 28.5         | 0.07        |               | 5.66             |
| 398        | 0.80        | 27.7         | 0.07        |               |                  |
| 274        | 0.78        | 25.8         | 0.06        |               |                  |
| 491        | 0.79        | 27.9         | 0.07        |               |                  |
| 295        | 0.80        | 24.8         | 0.06        |               |                  |
| <b>476</b> | <b>0.71</b> | <b>135.8</b> | <b>0.32</b> | <b>158.78</b> | <b>21.23</b>     |
| <b>448</b> | <b>0.73</b> | <b>159.3</b> | <b>0.39</b> |               | 13.37            |
| <b>303</b> | <b>0.76</b> | <b>187.0</b> | <b>3.46</b> |               |                  |
| <b>469</b> | <b>0.67</b> | <b>153.0</b> | <b>0.37</b> |               |                  |
| 12843      | 0.65        | 193.5        | 0.46        | 274.50        | 56.82            |
| 1310       | 0.77        | 324.5        | 2.75        |               | 20.70            |
| 9293       | 0.66        | 281.3        | 2.46        |               |                  |
| 1.06       | 0.86        | 298.6        | 3.38        |               |                  |
| <b>552</b> | <b>0.72</b> | <b>297.6</b> | <b>4.03</b> | <b>266.97</b> | <b>19.01</b>     |
| <b>366</b> | <b>0.71</b> | <b>269.8</b> | <b>3.04</b> |               | 7.12             |
| <b>276</b> | <b>0.72</b> | <b>244.9</b> | <b>0.61</b> |               |                  |
| <b>454</b> | <b>0.72</b> | <b>253.5</b> | <b>0.64</b> |               |                  |
| <b>519</b> | <b>0.72</b> | <b>256.7</b> | <b>0.64</b> |               |                  |
| <b>518</b> | <b>0.71</b> | <b>286.8</b> | <b>0.71</b> |               |                  |
| <b>538</b> | <b>0.74</b> | <b>259.3</b> | <b>3.71</b> |               |                  |
| 477        | 0.82        | 257.4        | 3.11        | 279.24        | 33.20            |
| 273        | 0.82        | 282.9        | 4.08        |               | 11.89            |
| 304        | 0.78        | 299.2        | 4.39        |               |                  |
| 231        | 0.70        | 320.3        | 0.77        |               |                  |
| 262        | 0.72        | 236.4        | 0.57        |               |                  |
| <b>389</b> | <b>0.72</b> | <b>204.3</b> | <b>0.50</b> | <b>224.45</b> | <b>32.03</b>     |
| <b>444</b> | <b>0.73</b> | <b>210.8</b> | <b>2.96</b> |               | 14.27            |

|      |      |       |      |        |       |
|------|------|-------|------|--------|-------|
| 358  | 0.72 | 234.0 | 0.57 |        |       |
| 361  | 0.70 | 253.3 | 0.62 |        |       |
| 344  | 0.74 | 263.0 | 3.28 |        |       |
| 441  | 0.72 | 262.2 | 3.89 |        |       |
| 395  | 0.75 | 253.7 | 4.57 |        |       |
| 890  | 0.71 | 210.8 | 4.36 |        |       |
| 1179 | 0.73 | 164.9 | 2.47 |        |       |
| 1170 | 0.74 | 189.3 | 3.24 |        |       |
| 569  | 0.71 | 222.7 | 0.52 |        |       |
| 175  | 0.70 | 276.6 | 0.66 | 282.71 | 12.29 |
| 441  | 0.71 | 281.5 | 0.63 |        | 4.35  |
| 447  | 0.70 | 272.4 | 0.67 |        |       |
| 355  | 0.68 | 300.3 | 0.73 |        |       |
