# Supplementary material for: Transpressional tectonics during the Variscan-Alpine cycle transition: supporting a multi-rifting model, evidence from the European western Southern Alps
Source: Copernicus journal article supplement (doi:10.5194/egusphere-2024-1135), 2024-04-29
Supplement: Supplementary file 2 [file egusphere-2024-1135-supplement.pdf]

**Table S1: (U-Th)/He results: Rs: equivalent spherical radius, L: zircon length; W1: zircon width; W2: zircon width; H: average height of zircon pinnacle; eU: effective Uranium; Ft: alpha-ejection correction factor; Ft Age: alpha-ejection corrected age.**

| Sample    | Zircon grain | <sup>238</sup> U<br>mol<br>E-12 | <sup>238</sup> U<br>1s<br>% | <sup>232</sup> Th<br>mol<br>E-12 | <sup>232</sup> Th<br>1s<br>% | Th/U | <sup>4</sup> He<br>mol<br>E-13 | <sup>4</sup> He<br>1s<br>% | Rs<br>μm | L<br>μm | W1<br>μm | W2<br>μm | H<br>μm | Mass<br>μg | eU<br>ppm | Ft   | Ft Age<br>Ma | Ft Age<br>1s<br>Ma | Average Age<br>Ma | Average Age<br>1s<br>Ma / % |
|-----------|--------------|---------------------------------|-----------------------------|----------------------------------|------------------------------|------|--------------------------------|----------------------------|----------|---------|----------|----------|---------|------------|-----------|------|--------------|--------------------|-------------------|-----------------------------|
| fct       | 4fctz1       | 6.13<br>1.41                    | 0.32                        | 3.45<br>7.72                     | 0.31                         | 0.56 | 1.82<br>4.67                   | 0.31                       | 39.99    | 188     | 66       | 58       | 27      | 2.70       | 614       | 0.71 | 28.6         | 0.09               | 27.21             | 1.54                        |
|           | 4fctz2       | 1.53<br>E-11                    | 0.10                        | 9.19<br>E-12                     | 0.22                         | 0.55 | 4.96<br>E-13                   | 0.25                       | 59.07    | 260     | 102      | 85       | 40      | 8.30       | 457       | 0.80 | 28.5         | 0.07               |                   | 5.66                        |
|           | 5fctz1       | 5.22<br>E-11                    | 0.39                        | 3.22<br>E-12                     | 0.20                         | 0.60 | 1.54<br>E-13                   | 0.24                       | 58.23    | 354     | 101      | 75       | 43      | 10.49      | 398       | 0.80 | 27.7         | 0.07               |                   |                             |
|           | 5fctz2       | 1.28<br>E-12                    | 0.28                        | 7.01<br>E-12                     | 0.29                         | 0.62 | 4.09<br>E-13                   | 0.25                       | 52.69    | 202     | 86       | 86       | 38      | 5.20       | 274       | 0.78 | 25.8         | 0.06               |                   |                             |
|           | 0fctz1       | 7.82<br>E-11                    | 0.44                        | 4.38<br>E-12                     | 0.37                         | 0.55 | 2.28<br>E-13                   | 0.24                       | 56.39    | 242     | 96       | 83       | 39      | 7.01       | 491       | 0.79 | 27.9         | 0.07               |                   |                             |
|           | 0fctz2       | 4.18<br>E-12                    | 0.26                        | 4.15<br>E-12                     | 0.09                         | 0.56 | 5.40<br>E-13                   | 0.23                       | 60.35    | 228     | 102      | 96       | 53      | 7.17       | 295       | 0.80 | 24.8         | 0.06               |                   |                             |
| aft0<br>2 | z1           | 4.35<br>E-12                    | 0.54                        | 5.78<br>E-13                     | 1.56                         | 0.10 | 6.87<br>E-13                   | 0.23                       | 38.42    | 150     | 66       | 59       | 23      | 2.15       | 476       | 0.71 | 135.8        | 0.32               | 158.78            | 21.23                       |
|           | z2           | 4.37<br>E-12                    | 0.33                        | 8.13<br>E-13                     | 1.04                         | 0.13 | 6.94<br>E-13                   | 0.24                       | 42.12    | 153     | 71       | 70       | 36      | 2.40       | 448       | 0.73 | 159.3        | 0.39               |                   | 13.37                       |
|           | z4           | 2.59<br>E-12                    | 0.33                        | 4.30<br>E-13                     | 0.75                         | 0.19 | 4.61<br>E-13                   | 0.24                       | 47.22    | 203     | 85       | 66       | 49      | 3.61       | 303       | 0.76 | 187.0        | 3.46               |                   |                             |
|           | z5           | 2.96<br>E-12                    | 0.58                        | 1.69<br>E-13                     | 1.52                         | 0.17 | 1.89<br>E-13                   | 0.24                       | 33.96    | 140     | 59       | 50       | 30      | 1.38       | 469       | 0.67 | 153.0        | 0.37               |                   |                             |
|           | z1           | 1.74<br>E-11                    | 0.22                        | 8.78<br>E-10                     | 0.40                         | 5.71 | 1.08<br>E-11                   | 0.83                       | 34.90    | 119     | 64       | 56       | 32      | 1.27       | 1284<br>3 | 0.65 | 193.5        | 0.46               | 274.50            | 56.82                       |
| aft0<br>3 | z2           | 4.13<br>E-11                    | 0.08                        | 1.25<br>E-11                     | 0.26                         | 5.03 | 1.81<br>E-11                   | 0.86                       | 56.68    | 247     | 108      | 76       | 52      | 6.85       | 1310      | 0.77 | 324.5        | 2.75               |                   | 20.70                       |
|           | z3           | 1.39<br>E-11                    | 0.27                        | 7.38<br>E-10                     | 0.19                         | 3.03 | 5.88<br>E-11                   | 1.11                       | 35.61    | 129     | 62       | 57       | 14      | 1.80       | 9293      | 0.66 | 281.3        | 2.46               |                   |                             |
|           | z6           | 4.73<br>E-13                    | 7                           | 8.21<br>E-14                     | 2.73                         | 0.53 | 1.40<br>E-14                   | 0.25                       | 83.49    | 562     | 144      | 106      | 48      | 35.39      | 1.06      | 0.86 | 298.6        | 3.38               |                   |                             |
|           | z1           | 3.20<br>E-12                    | 0.55                        | 9.33<br>E-13                     | 1.27                         | 0.17 | 8.65<br>E-12                   | 1.32                       | 40.01    | 173     | 64       | 62       | 43      | 2.14       | 552       | 0.72 | 297.6        | 4.03               | 266.97            | 19.01                       |
|           | z2           | 3.15<br>E-12                    | 0.46                        | 5.71<br>E-13                     | 0.78                         | 0.29 | 7.59<br>E-13                   | 1.10                       | 39.15    | 173     | 72       | 54       | 37      | 2.23       | 366       | 0.71 | 269.8        | 3.04               |                   | 7.12                        |
|           | z5           | E-12                            | 0.53                        | E-13                             | 1.08                         | 0.18 | E-13                           | 0.24                       | 39.52    | 196     | 63       | 58       | 21      | 2.85       | 276       | 0.72 | 244.9        | 0.61               |                   |                             |

|           |             |      |      |      |      |      |      |      |       |     |     |     |    |      |      |      |       |      |        |       |
|-----------|-------------|------|------|------|------|------|------|------|-------|-----|-----|-----|----|------|------|------|-------|------|--------|-------|
|           | dkzr1       | 3.82 | 0.54 | 1.96 | 0.40 | 0.51 | 1.03 | 0.25 | 41.47 | 180 | 70  | 61  | 50 | 2.25 | 454  | 0.72 | 253.5 | 0.64 |        |       |
|           |             | E-12 |      | E-12 |      |      | E-12 |      |       |     |     |     |    |      |      |      |       |      |        |       |
|           |             | 4.32 |      | 1.35 |      |      | 1.12 |      |       |     |     |     |    |      |      |      |       |      |        |       |
|           |             | 3.58 |      | 4.92 |      |      | 9.92 |      |       |     |     |     |    |      |      |      |       |      |        |       |
|           | dkzr2       | E-12 | 0.64 | E-12 | 0.74 | 0.31 | E-12 | 0.24 | 39.97 | 175 | 65  | 60  | 44 | 2.14 | 519  | 0.72 | 256.7 | 0.64 |        |       |
|           |             | 5.79 |      | E-13 |      |      | E-13 |      |       |     |     |     |    |      |      |      |       |      |        |       |
|           |             | 1.66 |      | 1.09 |      |      | 1.53 |      |       |     |     |     |    |      |      |      |       |      |        |       |
|           |             | 9.74 |      | 1.82 |      |      | 4.76 |      |       |     |     |     |    |      |      |      |       |      |        |       |
|           | dkzr3       | E-12 | 0.54 | E-13 | 0.55 | 0.14 | E-13 | 0.24 | 37.97 | 144 | 66  | 59  | 37 | 1.71 | 518  | 0.71 | 286.8 | 0.71 |        |       |
|           |             | 5.79 |      | 1.09 |      |      | 1.53 |      |       |     |     |     |    |      |      |      |       |      |        |       |
|           |             | 1.66 |      | 1.82 |      |      | 4.76 |      |       |     |     |     |    |      |      |      |       |      |        |       |
|           |             | 9.74 |      | 3.26 |      |      | 3.23 |      |       |     |     |     |    |      |      |      |       |      |        |       |
|           | dkzr4       | E-12 | 0.39 | E-12 | 0.20 | 0.19 | E-12 | 1.40 | 42.94 | 187 | 69  | 66  | 45 | 2.69 | 538  | 0.74 | 259.3 | 3.71 |        |       |
|           |             | 1.66 |      | 1.82 |      |      | 4.76 |      |       |     |     |     |    |      |      |      |       |      |        |       |
|           |             | 9.74 |      | 3.26 |      |      | 3.23 |      |       |     |     |     |    |      |      |      |       |      |        |       |
|           |             | 4.84 |      | 1.44 |      |      | 1.61 |      |       |     |     |     |    |      |      |      |       |      |        |       |
| aft0<br>6 | z1          | E-11 | 0.23 | E-12 | 0.37 | 0.11 | E-12 | 1.18 | 64.36 | 262 | 111 | 96  | 67 | 8.55 | 477  | 0.82 | 257.4 | 3.11 | 279.24 | 33.20 |
|           |             | 9.74 |      | 3.26 |      |      | 3.23 |      |       |     |     |     |    |      |      |      |       |      |        |       |
|           |             | 4.84 |      | 1.44 |      |      | 1.61 |      |       |     |     |     |    |      |      |      |       |      |        |       |
|           |             | 1.63 |      | 2.25 |      |      | 5.03 |      |       |     |     |     |    |      |      |      |       |      |        |       |
|           | z2          | E-12 | 0.15 | E-12 | 0.40 | 0.33 | E-12 | 1.41 | 65.29 | 246 | 108 | 106 | 55 | 9.20 | 273  | 0.82 | 282.9 | 4.08 |        | 11.89 |
|           |             | 4.84 |      | 1.44 |      |      | 1.61 |      |       |     |     |     |    |      |      |      |       |      |        |       |
|           |             | 1.63 |      | 2.25 |      |      | 5.03 |      |       |     |     |     |    |      |      |      |       |      |        |       |
|           |             | 2.31 |      | 4.58 |      |      | 5.42 |      |       |     |     |     |    |      |      |      |       |      |        |       |
|           | z3          | E-12 | 0.33 | E-12 | 0.43 | 0.30 | E-12 | 1.43 | 53.28 | 195 | 89  | 88  | 62 | 4.08 | 304  | 0.78 | 299.2 | 4.39 |        |       |
|           |             | 1.63 |      | 2.25 |      |      | 5.03 |      |       |     |     |     |    |      |      |      |       |      |        |       |
|           |             | 2.31 |      | 4.58 |      |      | 5.42 |      |       |     |     |     |    |      |      |      |       |      |        |       |
|           |             | 4.01 |      | 7.48 |      |      | 1.08 |      |       |     |     |     |    |      |      |      |       |      |        |       |
|           | z4          | E-12 | 0.85 | E-13 | 2.76 | 0.14 | E-13 | 0.23 | 37.57 | 150 | 62  | 59  | 35 | 1.74 | 231  | 0.70 | 320.3 | 0.77 |        |       |
|           |             | 2.31 |      | 4.58 |      |      | 5.42 |      |       |     |     |     |    |      |      |      |       |      |        |       |
|           |             | 4.01 |      | 7.48 |      |      | 1.08 |      |       |     |     |     |    |      |      |      |       |      |        |       |
|           |             | 5.68 |      | 1.47 |      |      | 1.51 |      |       |     |     |     |    |      |      |      |       |      |        |       |
|           | z5          | E-12 | 0.66 | E-13 | 1.44 | 0.20 | E-13 | 0.23 | 39.96 | 159 | 73  | 58  | 35 | 2.21 | 262  | 0.72 | 236.4 | 0.57 |        |       |
|           |             | 3.60 |      | 7.54 |      |      | 7.35 |      |       |     |     |     |    |      |      |      |       |      |        |       |
|           |             | 5.68 |      | 1.47 |      |      | 1.51 |      |       |     |     |     |    |      |      |      |       |      |        |       |
|           |             | 1.53 |      | 8.02 |      |      | 4.41 |      |       |     |     |     |    |      |      |      |       |      |        |       |
| aft0<br>7 | z1          | E-12 | 0.51 | E-13 | 0.96 | 0.21 | E-13 | 0.24 | 40.98 | 148 | 70  | 67  | 30 | 2.33 | 389  | 0.72 | 204.3 | 0.50 | 224.45 | 32.03 |
|           |             | 3.99 |      | 6.97 |      |      | 8.40 |      |       |     |     |     |    |      |      |      |       |      |        |       |
|           |             | 2.71 |      | 6.67 |      |      | 6.34 |      |       |     |     |     |    |      |      |      |       |      |        |       |
|           |             | 2.14 |      | 3.69 |      |      | 5.20 |      |       |     |     |     |    |      |      |      |       |      |        |       |
|           | z2          | E-12 | 0.39 | E-13 | 0.87 | 0.17 | E-13 | 1.38 | 41.59 | 148 | 73  | 67  | 37 | 2.24 | 444  | 0.73 | 210.8 | 2.96 |        | 14.27 |
|           |             | 2.71 |      | 6.67 |      |      | 6.34 |      |       |     |     |     |    |      |      |      |       |      |        |       |
|           |             | 2.14 |      | 3.69 |      |      | 5.20 |      |       |     |     |     |    |      |      |      |       |      |        |       |
|           |             | 4.01 |      | 7.48 |      |      | 1.08 |      |       |     |     |     |    |      |      |      |       |      |        |       |
|           | z3          | E-12 | 0.61 | E-13 | 0.90 | 0.25 | E-13 | 0.24 | 39.83 | 147 | 69  | 63  | 39 | 1.92 | 358  | 0.72 | 234.0 | 0.57 |        |       |
|           |             | 2.14 |      | 3.69 |      |      | 5.20 |      |       |     |     |     |    |      |      |      |       |      |        |       |
|           |             | 4.01 |      | 7.48 |      |      | 1.08 |      |       |     |     |     |    |      |      |      |       |      |        |       |
|           |             | 5.68 |      | 1.47 |      |      | 1.51 |      |       |     |     |     |    |      |      |      |       |      |        |       |
|           | z4          | E-12 | 0.71 | E-13 | 1.73 | 0.17 | E-13 | 0.24 | 36.84 | 123 | 64  | 63  | 33 | 1.48 | 361  | 0.70 | 253.3 | 0.62 |        |       |
|           |             | 4.01 |      | 7.48 |      |      | 1.08 |      |       |     |     |     |    |      |      |      |       |      |        |       |
|           |             | 5.68 |      | 1.47 |      |      | 1.51 |      |       |     |     |     |    |      |      |      |       |      |        |       |
|           |             | 1.53 |      | 8.02 |      |      | 4.41 |      |       |     |     |     |    |      |      |      |       |      |        |       |
|           | z5          | E-12 | 0.42 | E-13 | 0.88 | 0.19 | E-12 | 1.22 | 43.52 | 157 | 77  | 69  | 29 | 2.91 | 344  | 0.74 | 263.0 | 3.28 |        |       |
|           |             | 5.68 |      | 1.47 |      |      | 1.51 |      |       |     |     |     |    |      |      |      |       |      |        |       |
|           |             | 1.53 |      | 8.02 |      |      | 4.41 |      |       |     |     |     |    |      |      |      |       |      |        |       |
|           |             | 1.53 |      | 8.02 |      |      | 4.41 |      |       |     |     |     |    |      |      |      |       |      |        |       |
|           | dkzr1       | E-12 | 0.38 | E-12 | 0.19 | 0.26 | E-12 | 1.45 | 40.85 | 246 | 62  | 59  | 40 | 3.27 | 441  | 0.72 | 262.2 | 3.89 |        |       |
|           |             | 5.23 |      | 1.91 |      |      | 1.42 |      |       |     |     |     |    |      |      |      |       |      |        |       |
|           |             | 7.22 |      | 2.08 |      |      | 1.53 |      |       |     |     |     |    |      |      |      |       |      |        |       |
|           |             | 1.40 |      | 2.80 |      |      | 2.31 |      |       |     |     |     |    |      |      |      |       |      |        |       |
|           | dkzr2       | E-12 | 0.41 | E-12 | 0.23 | 0.37 | E-12 | 1.76 | 46.02 | 158 | 103 | 66  | 37 | 3.44 | 395  | 0.75 | 253.7 | 4.57 |        |       |
|           |             | 7.22 |      | 2.08 |      |      | 1.53 |      |       |     |     |     |    |      |      |      |       |      |        |       |
|           |             | 1.40 |      | 2.80 |      |      | 2.31 |      |       |     |     |     |    |      |      |      |       |      |        |       |
|           |             | 1.38 |      | 3.01 |      |      | 2.65 |      |       |     |     |     |    |      |      |      |       |      |        |       |
|           | dkzr3       | E-12 | 0.42 | E-12 | 0.21 | 0.29 | E-12 | 2.03 | 39.70 | 142 | 69  | 64  | 31 | 2.07 | 890  | 0.71 | 210.8 | 4.36 |        |       |
|           |             | 1.40 |      | 2.80 |      |      | 2.31 |      |       |     |     |     |    |      |      |      |       |      |        |       |
|           |             | 1.38 |      | 3.01 |      |      | 2.65 |      |       |     |     |     |    |      |      |      |       |      |        |       |
|           |             | 5.37 |      | 1.11 |      |      | 1.18 |      |       |     |     |     |    |      |      |      |       |      |        |       |
|           | dkzr4       | E-11 | 0.32 | E-12 | 0.18 | 0.20 | E-12 | 1.48 | 41.83 | 191 | 66  | 64  | 29 | 2.98 | 1179 | 0.73 | 164.9 | 2.47 |        |       |
|           |             | 1.38 |      | 3.01 |      |      | 2.65 |      |       |     |     |     |    |      |      |      |       |      |        |       |
|           |             | 5.37 |      | 1.11 |      |      | 1.18 |      |       |     |     |     |    |      |      |      |       |      |        |       |
|           |             | 1.53 |      | 8.02 |      |      | 4.41 |      |       |     |     |     |    |      |      |      |       |      |        |       |
|           | dkzr5       | E-11 | 0.24 | E-12 | 0.17 | 0.22 | E-12 | 1.68 | 43.04 | 184 | 69  | 66  | 34 | 2.96 | 1170 | 0.74 | 189.3 | 3.24 |        |       |
|           |             | 5.37 |      | 1.11 |      |      | 1.18 |      |       |     |     |     |    |      |      |      |       |      |        |       |
|           |             | 1.53 |      | 8.02 |      |      | 4.41 |      |       |     |     |     |    |      |      |      |       |      |        |       |
|           |             | 1.53 |      | 8.02 |      |      | 4.41 |      |       |     |     |     |    |      |      |      |       |      |        |       |
| aft0<br>8 | dkzr6       | E-12 | 0.43 | E-12 | 0.56 | 0.21 | E-12 | 0.23 | 39.11 | 169 | 63  | 60  | 26 | 2.37 | 569  | 0.71 | 222.7 | 0.52 |        |       |
|           |             | 1.53 |      | 8.02 |      |      | 4.41 |      |       |     |     |     |    |      |      |      |       |      |        |       |
|           |             | 1.53 |      | 8.02 |      |      | 4.41 |      |       |     |     |     |    |      |      |      |       |      |        |       |
|           |             | 1.53 |      | 8.02 |      |      | 4.41 |      |       |     |     |     |    |      |      |      |       |      |        |       |
|           | aft08z<br>1 | E-12 | 0.89 | E-13 | 0.81 | 0.53 | E-13 | 0.23 | 39.06 | 163 | 64  | 61  | 24 | 2.35 | 175  | 0.70 | 276.6 | 0.66 | 282.71 | 12.29 |
|           |             | 1.53 |      | 8.02 |      |      | 4.41 |      |       |     |     |     |    |      |      |      |       |      |        |       |
|           |             | 1.53 |      | 8.02 |      |      | 4.41 |      |       |     |     |     |    |      |      |      |       |      |        |       |
|           |             | 1.53 |      | 8.02 |      |      | 4.41 |      |       |     |     |     |    |      |      |      |       |      |        |       |

|        |      |      |      |      |      |      |      |       |     |    |    |    |      |     |      |       |      |  |      |
|--------|------|------|------|------|------|------|------|-------|-----|----|----|----|------|-----|------|-------|------|--|------|
| aft08z | 3.46 |      | 3.02 |      |      | 1.10 |      |       |     |    |    |    |      |     |      |       |      |  |      |
| 2      | E-12 | 0.51 | E-12 | 0.26 | 0.87 | E-12 | 0.22 | 40.71 | 138 | 72 | 68 | 29 | 2.26 | 441 | 0.71 | 281.5 | 0.63 |  | 4.35 |
| aft08z | 3.29 |      | 2.30 |      |      | 9.64 |      |       |     |    |    |    |      |     |      |       |      |  |      |
| 3      | E-12 | 0.46 | E-12 | 0.39 | 0.70 | E-13 | 0.24 | 39.02 | 148 | 64 | 64 | 30 | 2.05 | 447 | 0.70 | 272.4 | 0.67 |  |      |
| aft08z | 2.00 |      | 1.86 |      |      | 6.53 |      |       |     |    |    |    |      |     |      |       |      |  |      |
| 4      | E-12 | 0.78 | E-12 | 0.40 | 0.93 | E-13 | 0.24 | 36.32 | 138 | 61 | 58 | 29 | 1.63 | 355 | 0.68 | 300.3 | 0.73 |  |      |
